# Supplementary material for: MIND Diet Adherence Might be Associated with a Reduced Odds of Multiple Sclerosis: Results from a Case–Control Study
Source: PubMed Central journal article supplement — Neurol Ther. 2022 Jan 29;11(1):397–412. doi: 10.1007/s40120-022-00325-z (PMC8857348; doi:10.1007/s40120-022-00325-z), 2022-01-29
Supplement: 40120_2022_325_MOESM1_ESM.pdf [file 40120_2022_325_MOESM1_ESM.pdf]

# **MIND Diet Adherence Might Be Associated with a Reduced Odds of Multiple Sclerosis: Results From a Case-Control Study**

Morvarid Noormohammadi <sup>a</sup>, Zeinab Ghorbani <sup>b,c</sup>, Abdorreza Naser Moghadasi <sup>d</sup>, Zahra Saeedirad <sup>e</sup> Sahar Shahemi <sup>e,f</sup>, Milad Ghanaatgar <sup>e</sup>, Nasim Rezaeimanesh <sup>d,e</sup>, Azita Hekmatdoost <sup>e</sup>, Amir Ghaemi <sup>g</sup>, Soodeh Razeghi Jahromi <sup>d,e</sup>

<sup>a</sup> Student Research Committee, Department of Nutrition, School of Public Health, Iran University of Medical Sciences, Tehran, Iran.

<sup>b</sup> Cardiovascular Diseases Research Center, Department of Cardiology, Heshmat Hospital, School of Medicine, Guilan University of Medical Sciences, Rasht, Iran.

<sup>c</sup> Department of Clinical Nutrition, School of Medicine, Guilan University of Medical Sciences, Rasht, Iran.

<sup>d</sup> Multiple Sclerosis Research Center, Neuroscience Institute, Tehran University of Medical Sciences, Tehran, Iran.

<sup>e</sup> Department of Clinical Nutrition and Dietetics, Faculty of Nutrition and Food Technology, Shahid Beheshti University of Medical Sciences, Tehran, Iran.

<sup>f</sup> Nutrition and Endocrine Research Center, Research Institute for Endocrine Sciences, Shahid Beheshti University of Medical Sciences, Tehran, Iran.

<sup>g</sup> Department of Virology, Pasteur Institute of Iran, Tehran, Iran.

## **Corresponding author:**

Dr, Soodeh Razeghi Jahromi, PhD

razeghi@sina.tums.ac.ir

[soodehrazeghi@gmail.com](mailto:soodehrazeghi@gmail.com)

Department of Clinical Nutrition and Dietetics, Faculty of Nutrition and Food Technology, Shahid Beheshti University of Medical Sciences, Tehran, Iran.

Supplementary Table 1 Odds ratio (OR) estimates and 95% confidence intervals (CIs) for the association between MIND diet and multiple sclerosis in a sample of RRMS patients compared to healthy individuals based on the MIND diet and components score <sup>a</sup>

|                                   | B      | S.E.  | wald   | df | OR (95%CI)            | P for trend |
|-----------------------------------|--------|-------|--------|----|-----------------------|-------------|
| <b>MIND</b>                       |        |       |        |    |                       |             |
| Base Model <sup>b</sup>           | -0.938 | 0.143 | 43.085 | 1  | 0.391 (0.296, 0.518)  | <0.001      |
| Full Model <sup>c</sup>           | -0.683 | 0.165 | 17.049 | 1  | 0.505 (0.365, 0.698)  | <0.001      |
| <b>green leafy vegetables</b>     |        |       |        |    |                       |             |
| Base Model <sup>b</sup>           | -4.898 | 0.639 | 58.689 | 1  | 0.007 (0.002, 0.026)  | <0.001      |
| Full Model <sup>c</sup>           | -4.630 | 0.752 | 37.883 | 1  | 0.010 (0.002, 0.043)  | <0.001      |
| <b>other vegetables</b>           |        |       |        |    |                       |             |
| Base Model <sup>b</sup>           | -5.470 | 0.992 | 30.378 | 1  | 0.004 (0.001, 0.029)  | <0.001      |
| Full Model <sup>c</sup>           | -4.066 | 0.969 | 17.604 | 1  | 0.017 (0.003, 0.115)  | <0.001      |
| <b>nuts</b>                       |        |       |        |    |                       |             |
| Base Model <sup>b</sup>           | -1.742 | 0.562 | 9.613  | 1  | 0.175 (0.058, 0.527)  | 0.002       |
| Full Model <sup>c</sup>           | 0.074  | 0.749 | 0.010  | 1  | 1.077 (0.248, 4.673)  | 0.921       |
| <b>berries</b>                    |        |       |        |    |                       |             |
| Base Model <sup>b</sup>           | -0.513 | 0.430 | 1.427  | 1  | 0.599 (0.258, 1.389)  | 0.232       |
| Full Model <sup>c</sup>           | 0.248  | 0.588 | 0.179  | 1  | 1.282 (0.405, 4.056)  | 0.672       |
| <b>beans</b>                      |        |       |        |    |                       |             |
| Base Model <sup>b</sup>           | -6.430 | 2.173 | 8.756  | 1  | 0.002 (0.000, 0.114)  | 0.003       |
| Full Model <sup>c</sup>           | -4.981 | 2.764 | 3.247  | 1  | 0.007 (0.000, 1.547)  | 0.072       |
| <b>whole grains</b>               |        |       |        |    |                       |             |
| Base Model <sup>b</sup>           | -0.863 | 0.423 | 4.152  | 1  | 0.422 (0.184, 0.968)  | 0.042       |
| Full Model <sup>c</sup>           | -1.213 | 0.541 | 5.023  | 1  | 0.297 (0.103, 0.859)  | 0.025       |
| <b>fish</b>                       |        |       |        |    |                       |             |
| Base Model <sup>b</sup>           | -0.289 | 0.388 | 0.553  | 1  | 0.749 (0.350, 1.604)  | 0.457       |
| Full Model <sup>c</sup>           | 0.295  | 0.499 | 0.349  | 1  | 1.343 (0.505, 3.572)  | 0.555       |
| <b>poultry</b>                    |        |       |        |    |                       |             |
| Base Model <sup>b</sup>           | 0.301  | 0.720 | 0.175  | 1  | 1.352 (0.330, 5.545)  | 0.675       |
| Full Model <sup>c</sup>           | 1.511  | 0.906 | 2.781  | 1  | 4.531 (0.767, 26.753) | 0.095       |
| <b>olive oil</b>                  |        |       |        |    |                       |             |
| Base Model <sup>b</sup>           | -0.557 | 0.368 | 2.293  | 1  | 0.573 (0.279, 1.178)  | 0.130       |
| Full Model <sup>c</sup>           | 0.190  | 0.477 | 0.159  | 1  | 1.209 (0.475, 3.079)  | 0.690       |
| <b>red meats</b>                  |        |       |        |    |                       |             |
| Base Model <sup>b</sup>           | 0.377  | 0.517 | 0.532  | 1  | 1.458 (0.529, 4.013)  | 0.466       |
| Full Model <sup>c</sup>           | 0.193  | 0.678 | 0.081  | 1  | 1.213 (0.321, 4.582)  | 0.776       |
| <b>butter and stick margarine</b> |        |       |        |    |                       |             |
| Base Model <sup>b</sup>           | -0.386 | 0.750 | 0.265  | 1  | 0.680 (0.156, 2.956)  | 0.607       |
| Full Model <sup>c</sup>           | 1.021  | 0.980 | 1.085  | 1  | 2.777 (0.406, 18.972) | 0.298       |
| <b>cheese</b>                     |        |       |        |    |                       |             |
| Base Model <sup>b</sup>           | -0.807 | 0.451 | 3.212  | 1  | 0.446 (0.184, 1.079)  | 0.073       |
| Full Model <sup>c</sup>           | -1.526 | 0.581 | 6.887  | 1  | 0.217 (0.070, 0.680)  | 0.009       |
| <b>pastries and sweets</b>        |        |       |        |    |                       |             |
| Base Model <sup>b</sup>           | -3.336 | 1.189 | 7.877  | 1  | 0.036 (0.003, 0.366)  | 0.005       |
| Full Model <sup>c</sup>           | -2.259 | 1.204 | 3.521  | 1  | 0.104 (0.010, 1.106)  | 0.061       |
| <b>fried/fast foods</b>           |        |       |        |    |                       |             |
| Base Model <sup>b</sup>           | -4.671 | 2.076 | 5.065  | 1  | 0.009 (0.000, 0.547)  | 0.024       |
| Full Model <sup>c</sup>           | -3.974 | 2.266 | 3.075  | 1  | 0.019 (0.000, 1.596)  | 0.080       |

---

<sup>a</sup> logistic regression model

<sup>b</sup> adjusted for age (years), gender (male/female), smoking (yes/no), total calories (Kcal)

<sup>c</sup> additionally adjusted for BMI (Kg/m<sup>2</sup>), carbohydrate intake (gr/day), animal-based protein intake (gr/day), fiber intake (gr/day)
